# Supplementary material for: A Genome-Scale Metabolic Model of Methanoperedens nitroreducens: Assessing Bioenergetics and Thermodynamic Feasibility
Source: MDPI journal article supplement (doi:10.3390/metabo12040314), 2022-03-31
Supplement: s1 [file s1]

**Table 1.** Oxidation/reduction midpoint potentials for the reactions in reverse methanogenesis pathway.

| Oxidant                      | Reductant                    | Em(mv) |
|------------------------------|------------------------------|--------|
| CoM-S-S-CoB                  | CoM-SH + CoB-SH              | -140   |
| F420                         | F420H <sub>2</sub>           | -380   |
| Fd <sub>ox</sub>             | Fd <sub>red</sub>            | -520   |
| MQ                           | MQH <sub>2</sub>             | -80    |
| NO <sub>3</sub> <sup>-</sup> | NO <sub>2</sub> <sup>-</sup> | +420   |

**Table 2.** Gibbs free energy of the reactions in reverse methanogenesis pathway in *M. nitroreducens*. The Gibbs free energy of Mcr, Mtr and Mer + Mtd + Mch, Ftr + Fmd are published values. HdrDE, HdrABC, NarGH and Fqo are calculated with the published standard midpoint potentials presented in Supplementary Table 1, using  $\Delta G = -n F \Delta E$ . F is the Faraday constant, 0.09648kJ/eV, n is the number of moles of electrons transferred in the reaction.

| Enzyme          | Reaction                                                                                                                                                                 | $\Delta G^{\circ'}$<br>(kJ/mol) |
|-----------------|--------------------------------------------------------------------------------------------------------------------------------------------------------------------------|---------------------------------|
| Mcr             | CH <sub>4</sub> [c] + CoM-S-S-CoB[c] <=> CoB-SH[c] + CH <sub>3</sub> -CoM[c]                                                                                             | +45                             |
| Mtr             | CH <sub>3</sub> -CoM[c] + H <sub>4</sub> MPT[c] + 2 Na <sup>+</sup> [e] <=> CH <sub>3</sub> -H <sub>4</sub> MPT[c] + CoM-SH[c] + 2 Na <sup>+</sup> [c]                   | +30                             |
| HdrDE           | CoB-SH[c] + CoM-SH[c] + 2 H <sup>+</sup> [e] + MQ[c] <=> CoM-S-S-CoB[c] + MQH <sub>2</sub> [c] + 2 H <sup>+</sup> [c]                                                    | -11.58                          |
| HdrABC          | CoB-SH[c] + CoM-SH[c] + 2 Fd <sub>red</sub> [c] + 2 F420[c] <=> CoM-S-S-CoB[c] + 2 Fd <sub>ox</sub> [c] + 2 F420H <sub>2</sub> [c]                                       | +38.59                          |
| NarGH           | NO <sub>3</sub> <sup>-</sup> [e] + MQH <sub>2</sub> [c] + 4 H <sup>+</sup> [c] <=> NO <sub>2</sub> <sup>-</sup> [e] + MQ[c] + H <sub>2</sub> O[c] + 4 H <sup>+</sup> [e] | -96.48                          |
| Mer+Mtd<br>+Mch | CH <sub>3</sub> -H <sub>4</sub> MPT[c] + 2 F420[c] <=> CHO-H <sub>4</sub> MPT[c] + 2 F420H <sub>2</sub> [c]                                                              | -5.3                            |
| Ftr+Fmd         | CHO-H <sub>4</sub> MPT[c] + Fd <sub>ox</sub> [c] + H <sub>2</sub> O[c] <=> CO <sub>2</sub> [c] + H <sub>4</sub> MPT[c] + Fd <sub>red</sub> [c]                           | -32                             |
| Fqo             | F420H <sub>2</sub> [c] + MQ[c] + 3 H <sup>+</sup> [c] <=> F420[c] + MQH <sub>2</sub> [c] + 3 H <sup>+</sup> [e]                                                          | -57.87                          |
